# Supplementary material
Source: publisher figshare collection journal article supplement (https://karger.figshare.com/ndownloader/files/17400569)
Supplement: Supplementary file 1 [file 17400569]

## Sheet: Blad1
Appendix 2: Studies reporting on gestational age as possible predictor for INSURE failure
Study	Univariate analysis				Multivariate analysis
	Variable	INSURE SUCCESS group	INSURE FAILURE group	p-value	Variable	Measure of association (95% CI)
Ancora 2010		30.0 ± 1.6	28.7 ± 2.5	0.017
Brix 2014	No. of patients in GA category: 30 - 31 weeks 28 - 29 weeks 26 - 27 weeks <26 weeks	34/100 (34) 40/100 (40) 18/100 (18) 8/100 (8)	3/33 (9.1) 16/33 (48.5) 8/33 (24.2) 6/33 (18.2)	N.r.	GA category: 30 - 31 weeks 28 - 29 weeks 26 - 27 weeks <26 weeks	reference aOR 4.8 (1.3 - 18.0) aOR 4.9 (1.1 - 21.2) aOR 9.9 (1.8 - 55.6)
Cherif 2008		29.0 ± 1.1	29.2 ± 1.5	NS
	No. of patients with GA <30 weeks	41/74 (55.4)	17/35 (48.6)	NS
Danaei 2017	No. of patients with GA: <30 weeks >30 weeks	34/113 (30.1) 79/113 (69.9)	46/79 (58.2) 33/79 (41.8)	0.001	GA <30 weeks GA >30 weeks	reference aOR 0.78 (0.67 - 0.91)
Dani 2010	No. of patients with GA <27 weeks	27.0 ± 1.8 20/68 (29.4)	27.1 ± 2.1 3/7 (42.9)	0.891 0.761
Gharehbaghi 2014		31.0 ± 2.2	28.7 ± 2.9	<0.001
Li 2014		30.6 ± 1.1	30.5 ± 1.5	0.121
Morales-Barquet 2018		30.0 ± 2.1	29.0 ± 2.4	0.006
Najafian 2014	No. of patients in GA category: 33 - 37 weeks 28 - 32 weeks <28 weeks	4/29 (13.8) 20/29 (69.0) 5/29 (17.2)	0/16 (0) 6/16 (37.5) 10/16 (62.5)	0.465*
Naseh 2014	No. of patients in GA category (%): >37 weeks 33 - 37 weeks 28 - 32 weeks <28 weeks	19/179 (10.6) 89/179 (49.7) 65/179 (36.3) 6/179 (3.4)	N.r. N.r. N.r. N.r.	0.001*
Ognean 2016		29.4 ± 1.7	28.7 ± 1.8	0.130
Tagare 2014		30.8 (95% CI 29.0-32.5)	33.0 (95% CI 31.4-34.6)	0.066	GA >34 weeks GA <34 weeks	reference aOR 1.4 (0.7-1.8)
Talosi 2014		30.1 ± 2.4	27.7 ± 2.8	0.0002
Tooley 2003	Median (range)	27+2 (25+4 - 28+4)	26+4 (25+2 - 27+6)	0.046
Univariate analysis: values represent mean ± standard deviation or number of patients (% of total), unless otherwise noted.
Typography: * ANOVA (analysis of variance)
No.: number; 95% CI: 95% confidence interval; GA: gestational age; aOR: adjusted odds ratio; N.r.: not reported; NS: not significant.
